# Supplementary material for: A first adrenalone electrochemical sensor using a gold-nanoparticle/poly(pyrrole) composite-modified graphite electrode
Source: Royal Society of Chemistry journal article supplement (doi:10.1039/c8ay02765j), 2019-01-01
Supplement: c8ay02765j1.pdf [file c8ay02765j1.pdf]

## Supplementary information data

# First Adrenalone Electrochemical Sensor Using a Gold-nanoparticle/Poly(pyrrole) Composite-modified Graphite Sensor

*Shokoofe Jahandari, Mohammad Ali Taher, \* Hassan Karimi-Maleh\**

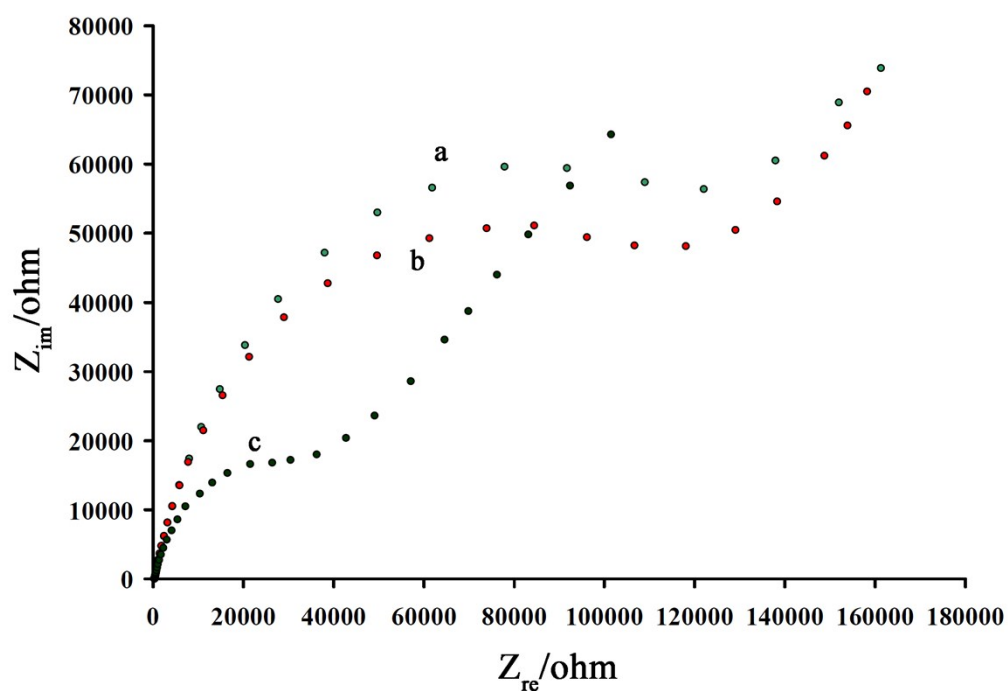

**Figure S1.** EIS responses of (a) bare PGE, (b) PP/PGE, and (c) Au-NPs/PP/PGE in the presence of 1.0 mM  $[\text{Fe}(\text{CN})_6]^{3-/4-}$  in 0.1 M KCl.

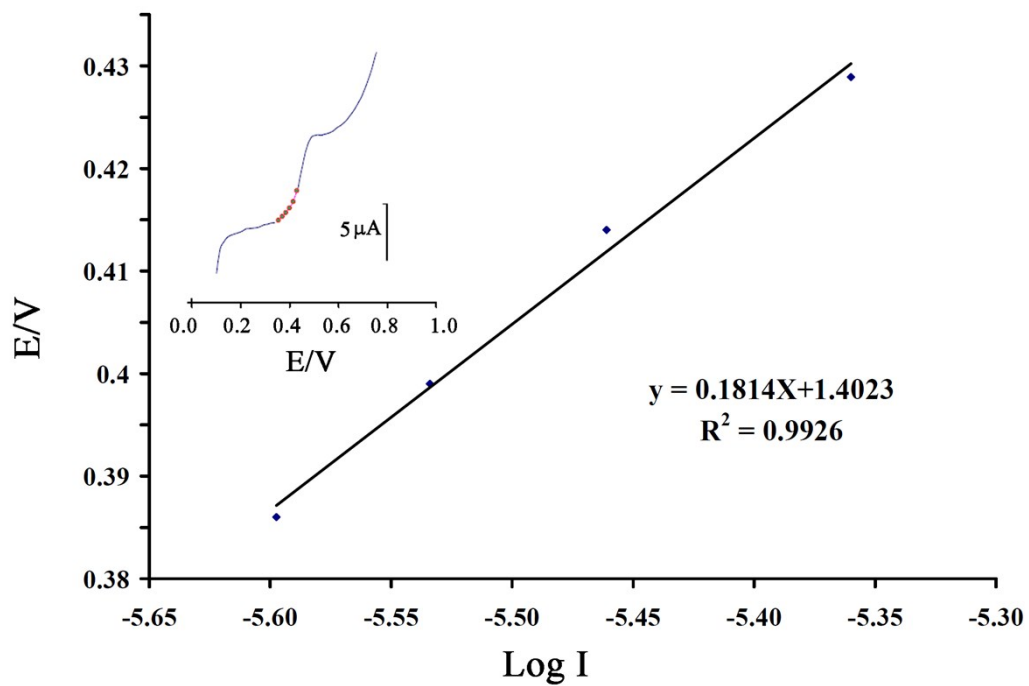

**Figure S2.** Tafel plot for Au-NPs/PP/PGE in 0.1 M PBS (pH 7.0) in the presence of 150 μM adrenalone.

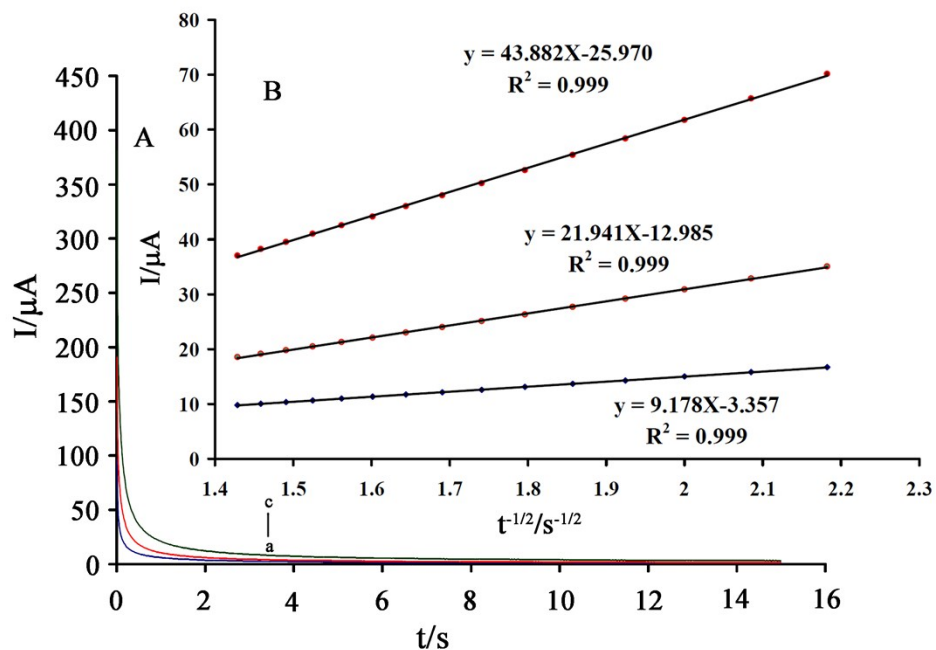

**Figure S3.** A) Chronoamperograms obtained at the Au-NPs/PP/PGE in the presence of a) 200, b) 400 and c) 600  $\mu\text{M}$  adrenalone in the buffer solution (pH 7.0). B) Cottrell's plot for the data from the chronoamperograms.

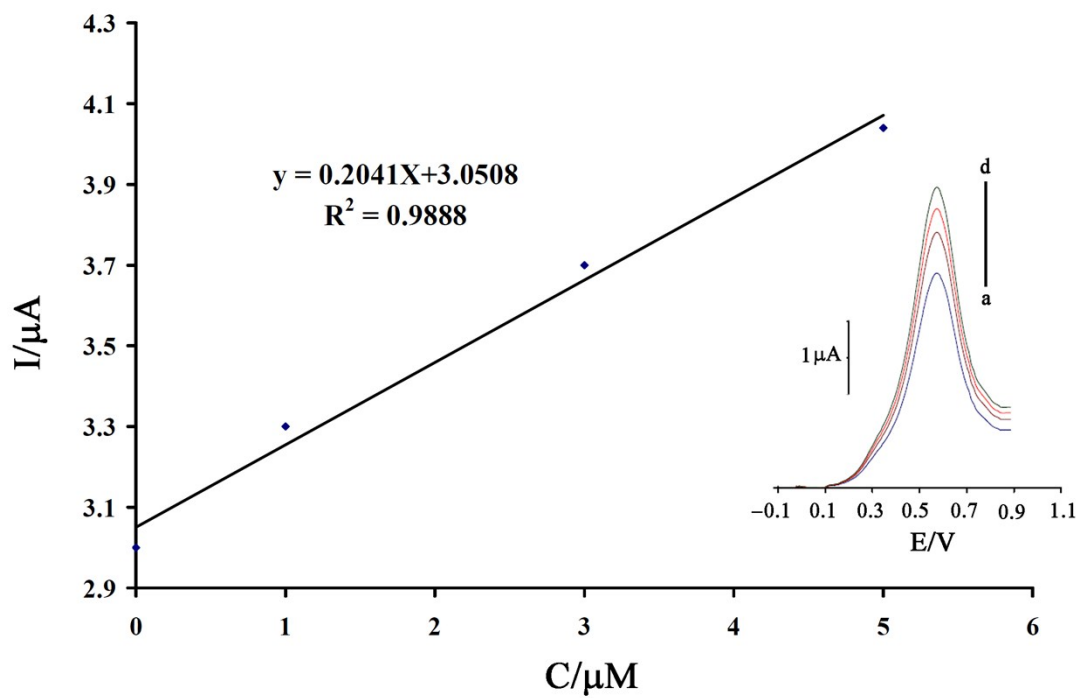

**Figure S4;** Square wave voltammograms of Au-NPs/PP/PGE in a solution containing pharmaceutical serum sample for row no. 8 from Table 1. Adrenalone added as a) 0.0, b) 1.0, c) 3.0, and d) 5.0  $\mu\text{M}$
